# Supplementary material
Source: publisher figshare collection journal article supplement (https://rs.figshare.com/ndownloader/files/35933419)
Supplement: Supplementary file 1 [file 35933419]

clear % circular aperture diffraction vertical section
load('parameters.mat', 'hsi','Rs', 'Depth','Depthr', 'n','num','wls', 'WHr', 'savef', 'f'); 
xmax=WHr;  % radius of circular aperture
funz = 1; % flate 
funR = @(r, phs, Xscr,L) sqrt((1-funz+L).^2+(r.*cos(phs)-Xscr).^2+(r.*sin(phs)).^2);
funth = @(r, phs, Xscr,L) atan(sqrt((r.*cos(phs)-Xscr).^2+(r.*sin(phs)).^2)./L);
funphase = @(r,phs,Xscr,L,wl,phase) r.*(cos((2*pi./wl).*funz+(2*pi./wl).*n.*funR(r, phs, Xscr, L)+phase)+i*sin((2*pi./wl).*funz+(2*pi./wl).*n.*funR(r, phs, Xscr, L)+phase)).*cos(0.5*funth(r, phs, Xscr, L))./funR(r, phs, Xscr, L);  % point source 1D integration
positionx=zeros(1,101);positiony=zeros(1,101);Int=zeros(1,101); % Int1=zeros(1,101);Int2=zeros(1,101);Int3=zeros(1,101);Int4=zeros(1,101);
%savefile = ['data/aper/', savef, '.dat'];
% for mm=1:num
    wl=0.1;wln=round(wl*1000);wlns=num2str(wln);% wl=wls(mm);wln=round(wl*1000);wlns=num2str(wln);
    savefile = ['data04/aper/xzwl',wlns, savef , '.dat'];
for j=1:51
    L=(j-1)*Depthr/50+Depth;
    for i=1:101
        Xs=(i-51)*Rs/50;
        phase=0; %-(2*pi/wl)*n*(1+L);% thmax2=2*thmax/3;thmax1=thmax/3;
        amp=integral2 (@(r, phs) funphase(r,phs,Xs, L,wl,phase),0,xmax,-pi,pi,'method','iterated','RelTol',1e-6,'AbsTol',0);
        Int(i)=abs(amp)^2; %Int2(i)=abs(amp2)^2;Int3(i)=abs(amp3)^2;
        positiony(i)=L*hsi;positionx(i)=Xs*hsi;
    end
    data=[positionx', positiony',Int'];
    if j==1
        save(savefile, 'data','-ascii','-tabs');
    else
        save(savefile, 'data','-ascii','-tabs','-append');
    end
end
%end
